# Supplementary material for: Protein phosphatase AP2C1 negatively regulates basal resistance and defense responses to Pseudomonas syringae
Source: PubMed Central journal article supplement (PMC5444444; doi:10.1093/jxb/erw485), 2017-01-06
Supplement: erw485_suppl_supplementary_figures_S1_S7_Tables_S1_S2.pdf [file erw485_suppl_supplementary_figures_S1_S7_Tables_S1_S2.pdf]

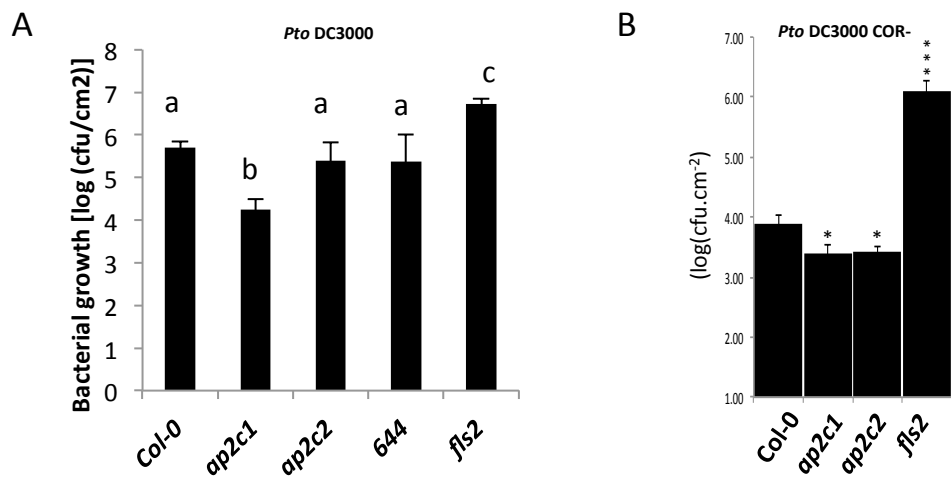

**Figure S1: Susceptibility of plants to *P. syringae*.**

**A** - Adult four-week-old plants were spray-infected with *Pseudomonas syringae* pv. *tomato* (*Pto*) DC3000 and bacterial count measured 4 d.p.i. 644: complemented line *ap2c1/AP2C1p::AP2C1-GFP*. One-way ANOVA/Holm-Sidak  $a \neq b$   $P < 0.002$ ,  $a \neq c$   $P < 0.001$ .

**B** - Five-week-old plants were spray inoculated with *Pto* DC3000 COR<sup>-</sup> (OD<sub>600</sub> = 0.02) and analyzed for bacterial growth at 3 d.p.i. Results are average  $\pm$  SE ( $n = 6$ ), performed with similar results two times.

Asterisks indicate:  $p < 0.05$  (\*);  $p < 0.005$  (\*\*\*) by *t*-test.

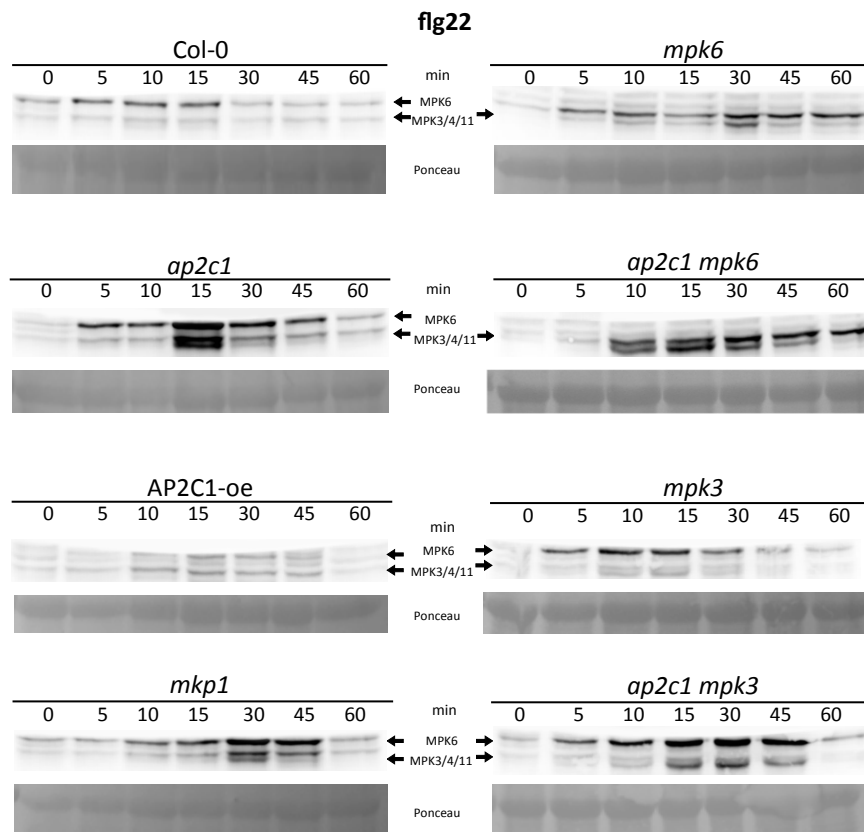

**Figure S2. Analysis of MAPK activation in plants by flg22.**

Western blotting with anti-p44/42 antibodies. PAMP activation of MAPKs in Arabidopsis seedlings of WT and modified lines after treatment with 1 μM flg22. The immunoreactive protein bands corresponding to respective MAPKs are indicated in the top panels, Ponceau staining was used to estimate equal loading (bottom panels).

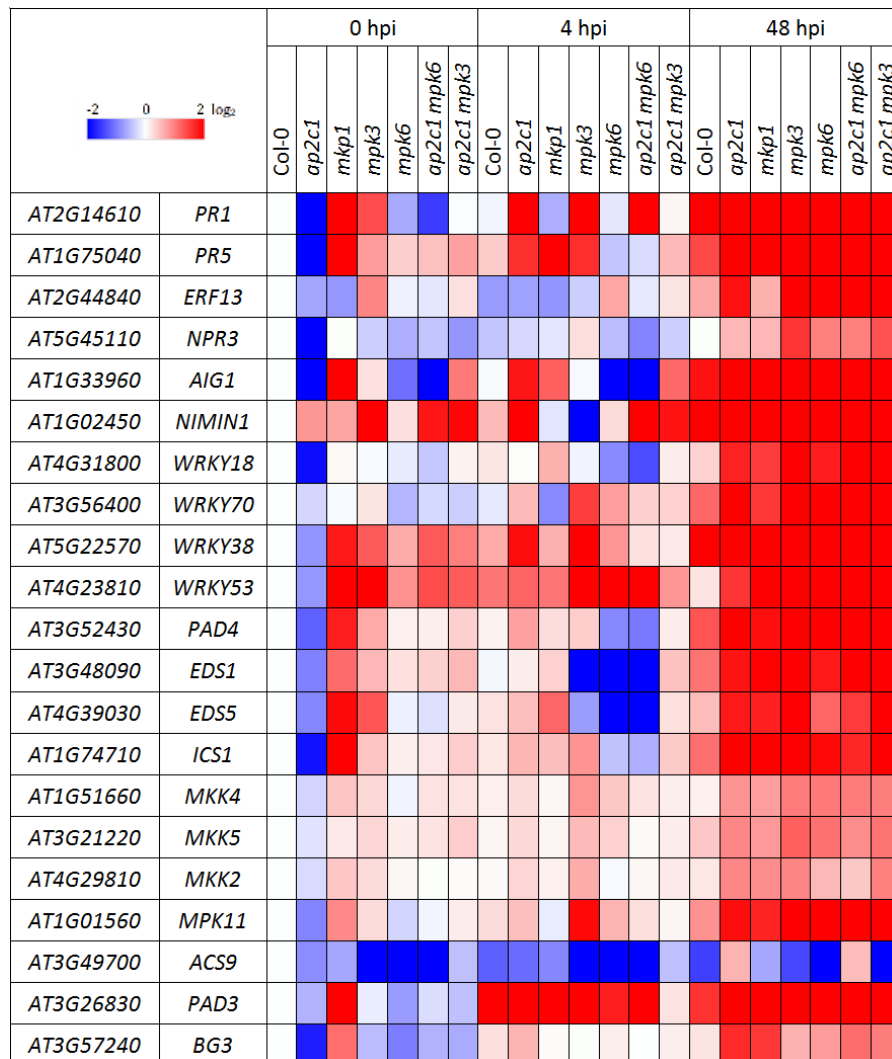

**Figure S3. Heat map of pathogen-related gene expression during the immune response to *Pto* DC3000 infection.** Expression levels were determined in leaves of treated plants by multi-parallel qRT-PCR analysis. Adult four-week-old plants were sprayed with *Pto* DC3000 or water as a mock control and harvested at 0, 4 and 48 hours post infection (hpi). The relative gene expression was normalized to the reference gene, *ACTIN2*. Blue and red indicate lower and higher expression values, respectively. Intensity of the colors is proportional to the absolute value of  $\log_2$  of the gene expression difference compared to WT at 0 hpi. White indicates no change in gene expression compared to WT at 0 hpi. Results are mean of three biological and two technical replicates for each experiment.

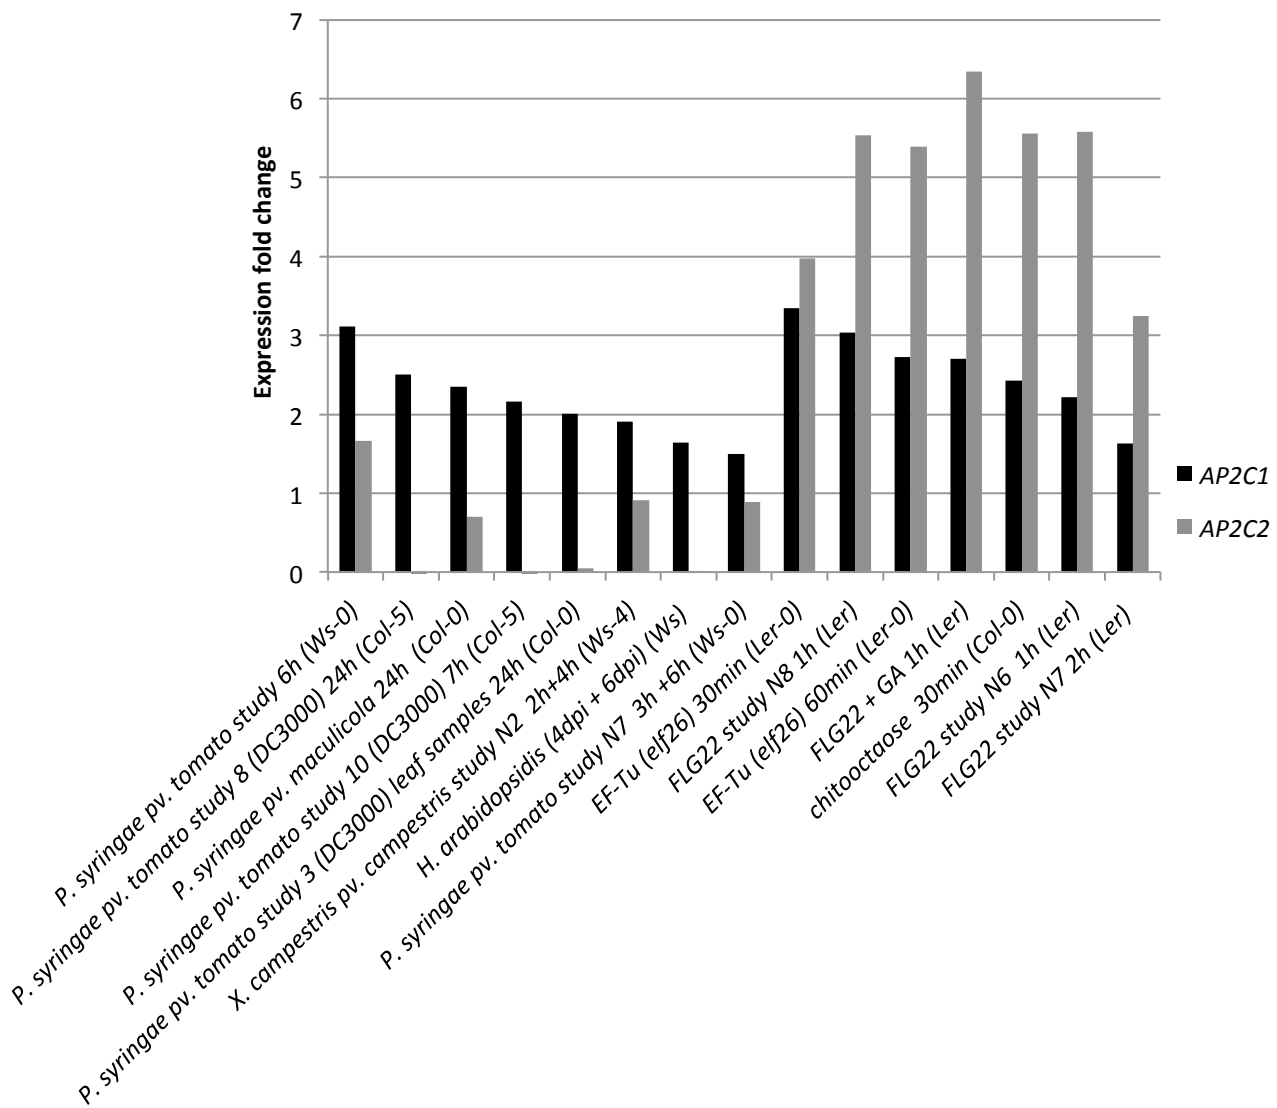

**Figure S4. Expression analysis of *AP2C1* and *AP2C2* in response to pathogens and PAMPs using Genevestigator.**

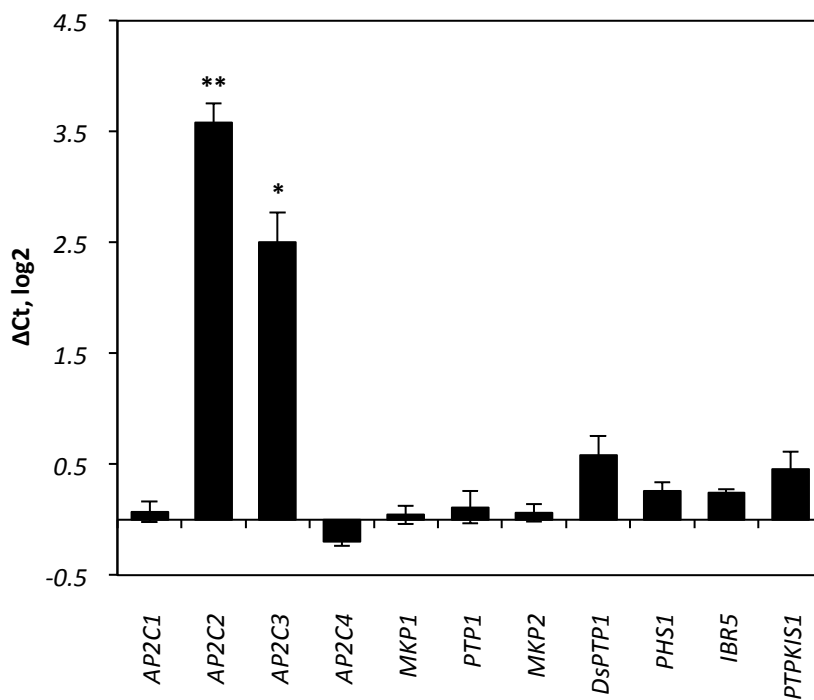

**Figure S5. Induction of MAPK-phosphatases upon elf18 treatment.**

qRT-PCR analysis of expression of MAPK-phosphatase genes in Col-0 14-day-old seedlings treated for 180 min with 100 nM elf18. Gene expression was normalized to expression of *ACTIN2* and plotted relative to non-treated expression levels in Col-0. Results are average of  $\pm$  SE ( $n = 3$ ), performed in two biological replicates. Asterisks indicate:  $p < 0.1$  (\*),  $p < 0.05$  (\*\*) by *t*-test.

**Table S1. Expression of transcription factors (TFs) in plants in response to *Pto* DC3000 treatment.** Selected members that are altered in *ap2c1* mutant compared to wild-type plants from analysis of 1880 TFs. Expression levels were determined by multi-parallel qRT-PCR and are shown as log<sub>2</sub> changes of treated and untreated *ap2c1* mutant plant leaves compared to WT control. Two biological replicates with two technical replicates in each repetition were performed. The data are means of the two biological replicates, SE – standard error.

| AGI       | Gene family      | ap2c1 / WT (4 hpi) | SE   | ap2c1 / WT (0 hpi) | SE   |
|-----------|------------------|--------------------|------|--------------------|------|
| AT1G49120 | AP2/EREBP        | -4,25              | 0,69 | 1,20               | 0,58 |
| AT5G19790 | AP2/EREBP        | 5,37               | 0,87 | 2,39               | 0,63 |
| AT5G21960 | AP2/EREBP        | 7,96               | 0,28 | -0,61              | 0,81 |
| AT5G51990 | AP2/EREBP        | 5,58               | 0,49 | -0,08              | 0,73 |
| AT5G65130 | AP2/EREBP        | 6,78               | 0,13 | -1,19              | 0,15 |
| AT2G20350 | AP2/EREBP        | -7,36              | 0,05 | -3,13              | 0,78 |
| AT1G36000 | AS2 (LOB) I      | 5,67               | 0,37 | -2,95              | 0,55 |
| AT1G72980 | AS2 (LOB) I      | -5,86              | 0,31 | 2,78               | 0,48 |
| AT2G19820 | AS2 (LOB) I      | -5,32              | 0,95 | 0,42               | 0,91 |
| AT2G42430 | AS2 (LOB) I      | -5,76              | 0,94 | 1,70               | 0,19 |
| AT5G66870 | AS2 (LOB) I      | -8,26              | 0,44 | 1,47               | 0,57 |
| AT3G46770 | B3               | 4,79               | 0,71 | 0,75               | 0,17 |
| AT5G09780 | B3               | -5,97              | 0,45 | 0,00               | 0,38 |
| AT5G18000 | B3               | 4,29               | 0,92 | 0,99               | 0,87 |
| AT5G57720 | B3               | -6,03              | 0,68 | -2,94              | 0,78 |
| AT1G63650 | bHLH             | 6,54               | 0,60 | 0,44               | 0,23 |
| AT2G31220 | bHLH             | 5,13               | 0,48 | -0,43              | 0,22 |
| AT4G28790 | bHLH             | 5,70               | 0,28 | -1,91              | 0,13 |
| AT5G41315 | bHLH             | 7,66               | 0,01 | -1,16              | 0,23 |
| AT5G43650 | bHLH             | 5,36               | 0,27 | -0,94              | 0,21 |
| AT1G14685 | BPC/BRR          | 16,33              | 0,75 | -0,03              | 0,66 |
| AT2G17770 | bZIP             | 5,85               | 0,14 | 1,02               | 0,80 |
| AT4G10240 | C2C2(Zn) CO-like | 5,57               | 0,92 | 1,97               | 0,96 |
| AT4G15250 | C2C2(Zn) CO-like | -6,29              | 0,65 | 0,00               | 0,86 |
| AT1G75540 | C2C2(Zn) CO-like | -4,94              | 0,14 | 0,63               | 0,83 |
| AT3G52440 | C2C2(Zn) DOF     | -5,27              | 0,49 | 1,48               | 0,08 |
| AT4G21080 | C2C2(Zn) DOF     | 5,54               | 0,66 | -1,48              | 0,74 |
| AT3G45170 | C2C2(Zn) GATA    | -5,92              | 0,97 | 0,28               | 0,02 |
| AT3G62850 | C2H2             | -4,74              | 0,37 | -0,31              | 0,33 |
| AT1G34790 | C2H2             | 4,15               | 0,54 | 0,00               | 0,09 |
| AT2G27630 | C2H2             | 5,44               | 0,02 | 1,36               | 0,73 |
| AT3G01030 | C2H2             | -7,65              | 0,43 | -0,63              | 0,84 |
| AT5G15480 | C2H2             | -5,11              | 0,31 | -0,45              | 0,79 |
| AT5G40310 | C2H2             | 6,65               | 0,07 | -0,01              | 0,87 |
| AT5G56200 | C2H2             | -4,93              | 0,73 | -0,25              | 0,97 |
| AT5G61470 | C2H2             | 4,54               | 0,63 | 0,00               | 0,93 |
| AT2G47810 | CCAAT-HAP3       | -5,29              | 0,94 | 0,63               | 0,62 |
| AT3G13960 | GRF              | -5,51              | 0,27 | 0,98               | 0,11 |
| AT2G36610 | HB               | -4,20              | 0,83 | 0,20               | 0,16 |
| AT3G03660 | HB               | -4,82              | 0,01 | 0,00               | 0,49 |
| AT3G11260 | HB               | 7,42               | 0,04 | -1,98              | 0,23 |
| AT3G27970 | HB               | 7,94               | 0,88 | 0,00               | 0,89 |
| AT3G55210 | HB               | 4,55               | 0,69 | -2,20              | 0,41 |
| AT4G08150 | HB               | -6,70              | 0,45 | 1,12               | 0,67 |
| AT5G19520 | HB               | -6,55              | 0,71 | 1,82               | 0,01 |
| AT5G46010 | HB               | 7,02               | 0,05 | 0,00               | 0,15 |
| AT5G53980 | HB               | 6,74               | 0,66 | -0,19              | 0,43 |
| AT1G34650 | HB               | 7,20               | 0,52 | -2,62              | 0,93 |
| AT3G51910 | HSF              | -4,81              | 1,00 | -0,01              | 0,96 |
| AT2G38950 | JUMONJI          | -7,20              | 0,73 | -1,03              | 0,78 |
| AT3G04100 | MADS             | -6,20              | 0,28 | 0,00               | 0,81 |
| AT4G09960 | MADS             | -5,15              | 0,82 | -1,05              | 0,44 |
| AT4G36590 | MADS             | -4,03              | 0,72 | 0,53               | 0,74 |
| AT5G27090 | MADS             | -7,33              | 0,87 | -0,43              | 0,35 |
| AT5G27810 | MADS             | -5,99              | 0,12 | 0,00               | 0,00 |
| AT5G37415 | MADS             | -5,52              | 0,99 | 0,00               | 0,47 |
| AT5G40120 | MADS             | -4,35              | 0,97 | 0,00               | 0,12 |
| AT5G40220 | MADS             | 6,68               | 0,41 | 0,23               | 0,82 |
| AT1G28450 | MADS             | -4,08              | 0,25 | -0,92              | 0,42 |
| AT1G59810 | MADS             | -5,65              | 0,20 | -0,38              | 0,61 |
| AT1G60920 | MADS             | -4,54              | 0,59 | -0,07              | 0,15 |
| AT2G03060 | MADS             | -5,70              | 0,53 | 1,35               | 0,80 |
| AT2G42830 | MADS             | -6,92              | 0,48 | 0,95               | 0,54 |
| AT1G68320 | MYB              | -5,81              | 0,31 | 1,94               | 0,02 |
| AT5G10280 | MYB              | -4,00              | 0,40 | 0,00               | 0,07 |
| AT5G11050 | MYB              | -5,40              | 0,54 | 0,86               | 0,90 |
| AT5G14750 | MYB              | 6,90               | 0,84 | 0,00               | 0,67 |
| AT2G26950 | MYB              | 6,60               | 0,78 | 0,67               | 0,74 |
| AT5G17800 | MYB              | -4,36              | 0,86 | 0,00               | 0,62 |
| AT5G39700 | MYB              | -7,60              | 0,04 | 0,62               | 0,64 |
| AT1G17950 | MYB              | -7,17              | 0,75 | 0,58               | 0,15 |
| AT3G61250 | MYB              | -4,71              | 0,15 | 0,27               | 0,32 |
| AT1G18960 | MYB              | -5,00              | 0,65 | 1,54               | 0,21 |
| AT1G55160 | MYB              | -4,50              | 0,94 | -0,69              | 0,66 |
| AT1G66380 | MYB              | 7,12               | 0,19 | 1,85               | 0,19 |
| AT2G46770 | NAC              | 5,35               | 0,20 | -0,55              | 0,01 |
| AT3G18400 | NAC              | 5,32               | 0,71 | 0,01               | 0,24 |
| AT4G17980 | NAC              | -5,55              | 0,32 | 0,72               | 0,75 |
| AT5G41090 | NAC              | -4,52              | 0,14 | 0,31               | 0,82 |
| AT1G18790 | NIN-like         | 6,91               | 0,01 | 0,00               | 0,70 |
| AT4G38340 | NIN-like         | 6,94               | 0,82 | 0,36               | 0,17 |
| AT2G21400 | SRS              | 6,51               | 0,26 | -0,74              | 0,17 |
| AT1G05690 | TAZ              | -11,89             | 0,38 | -0,28              | 0,69 |
| AT2G20825 | ULT              | -4,36              | 0,25 | -2,63              | 0,53 |
| AT5G01900 | WRKY             | 7,21               | 0,86 | 0,92               | 0,96 |
| AT5G22570 | WRKY             | 11,30              | 0,66 | 0,73               | 0,55 |
| AT5G43290 | WRKY             | 7,21               | 0,21 | 0,97               | 0,97 |
| AT1G30650 | WRKY             | -7,07              | 0,63 | 0,83               | 0,69 |

| Transcription Factor / Motif Name | prom's bound in subset |    | prom's bound in genome |       | p-value in genome |
|-----------------------------------|------------------------|----|------------------------|-------|-------------------|
| TATA-boxMotif                     | 88%                    | 77 | 82%                    | 24789 | 0,001             |
| MYB1AT                            | 79%                    | 69 | 85%                    | 25733 | 0,145             |
| MYB4bindingsitemotif              | 75%                    | 66 | 75%                    | 22642 | 0,012             |
| CARGCW8GAT                        | 67%                    | 59 | 59%                    | 18011 | 0,005             |
| T-boxpromotermotif                | 54%                    | 47 | 55%                    | 16720 | 0,08              |
| W-boxpromotermotif                | 54%                    | 47 | 67%                    | 20292 | 0,807             |
| GAREAT                            | 50%                    | 44 | 55%                    | 16578 | 0,327             |
| ARFbindingsitemotif               | 48%                    | 42 | 40%                    | 12192 | <10e-3            |
| AtMYC2BSinRD22                    | 41%                    | 36 | 35%                    | 10746 | 0,011             |
| MYCATERD1                         | 41%                    | 36 | 35%                    | 10746 | 0,011             |
| Iboxpromotermotif                 | 40%                    | 35 | 40%                    | 12259 | 0,084             |
| BoxIIpromotermotif                | 34%                    | 30 | 42%                    | 12901 | 0,684             |
| MYBbindingsitepromoter            | 24%                    | 21 | 30%                    | 9215  | 0,585             |
| MYB2AT                            | 22%                    | 20 | 29%                    | 8742  | 0,595             |
| CCA1bindingsitemotif              | 20%                    | 18 | 27%                    | 8251  | 0,771             |
| DREcoremotif                      | 20%                    | 18 | 23%                    | 6989  | 0,336             |
| L1-boxpromotermotif               | 20%                    | 18 | 14%                    | 4471  | 0,033             |
| ATHB2bindingsitemotif             | 19%                    | 17 | 10%                    | 3181  | 0,005             |
| ABRE-likebindingsitemotif         | 17%                    | 15 | 20%                    | 6258  | 0,641             |
| CACGTGMOTIF                       | 16%                    | 14 | 15%                    | 4546  | 0,277             |
| MYB1LEPR                          | 13%                    | 12 | 17%                    | 5127  | 0,619             |
| AtMYB2BSinRD22                    | 12%                    | 11 | 12%                    | 3757  | 0,248             |
| Gap-boxMotif                      | 12%                    | 11 | 10%                    | 3174  | 0,131             |
| LEAFYATAG                         | 11%                    | 10 | 10%                    | 3293  | 0,181             |
| SV40corepromotermotif             | 11%                    | 10 | 20%                    | 6246  | 0,875             |
| ACGTABREMOTIFA2OSEM               | 10%                    | 9  | 14%                    | 4398  | 0,809             |
| GADOWNAT                          | 10%                    | 9  | 8%                     | 2579  | 0,226             |

**Table S2. Promoter region analysis of 88 selected TFs, which are significantly altered in *ap2c1* plants treated with *Pto* DC3000 in comparison to WT.** Promoter motives identified according to Athena web-based research tool. TF binding frequency and enrichment for subselected promoters and TFs were calculated. Database crossreference for these transcription factors is provided as well as a statistical test for enrichment of binding activity within the set of selected promoters.

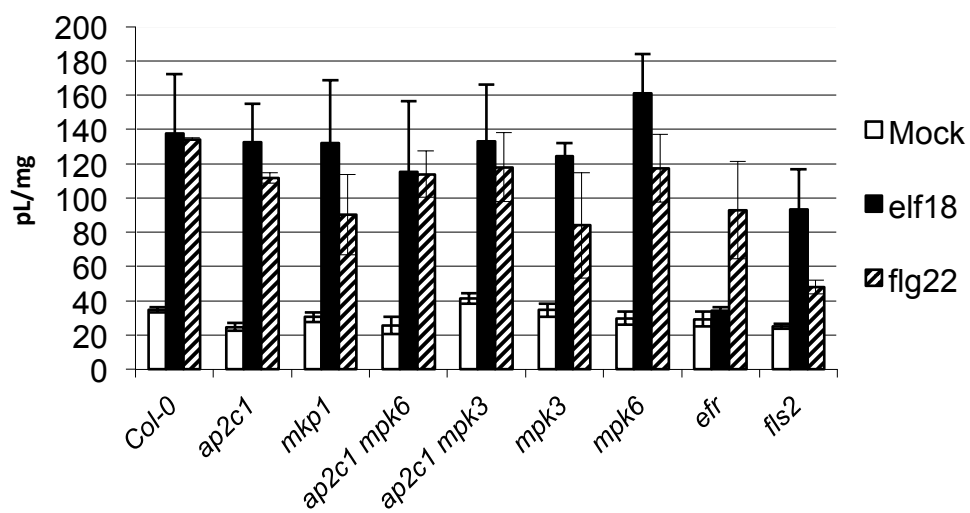

**Figure S6. PAMP-induced ethylene production in seedlings.**

Two-week-old seedlings of Col-0 and corresponding mutant lines were treated with 100 nM elf18 or flg22 and ethylene measurements were performed 24 hours after treatment. Results shown are average  $\pm$  SE (n=6).



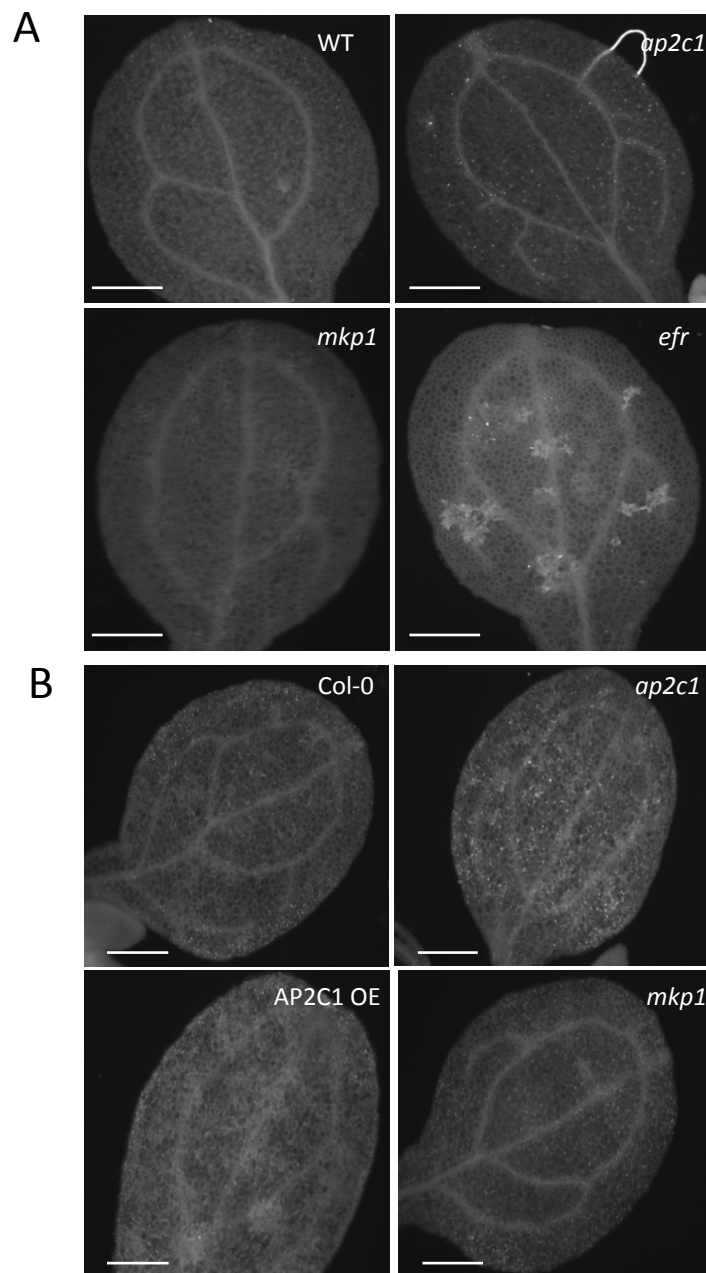

**Figure S7. Callose deposition in cotyledons in response to the elf18 or to *Pto* DC3000.**

Ten-day-old seedlings were treated for 24 h with 1 μM elf18 or with *Pto* DC3000 (OD<sub>600</sub> = 0.02). Photographs of aniline blue–stained cotyledons under UV epifluorescence show morphological differences between the lines.

**A** – Callose deposition in response to 1 μM elf18; **B** - Callose deposition in response to *Pto* DC3000. Bar = 1 mm
